# Supplementary material for: Gut microbial community and fecal metabolomic signatures in different types of osteoporosis animal models
Source: publisher site journal article supplement (doi:10.18632/aging.205396), 2024-01-26
Supplement: Supplementary file [file aging-v16i2-205396-supplementary-material-SD1.pdf]

## SUPPLEMENTARY FIGURES

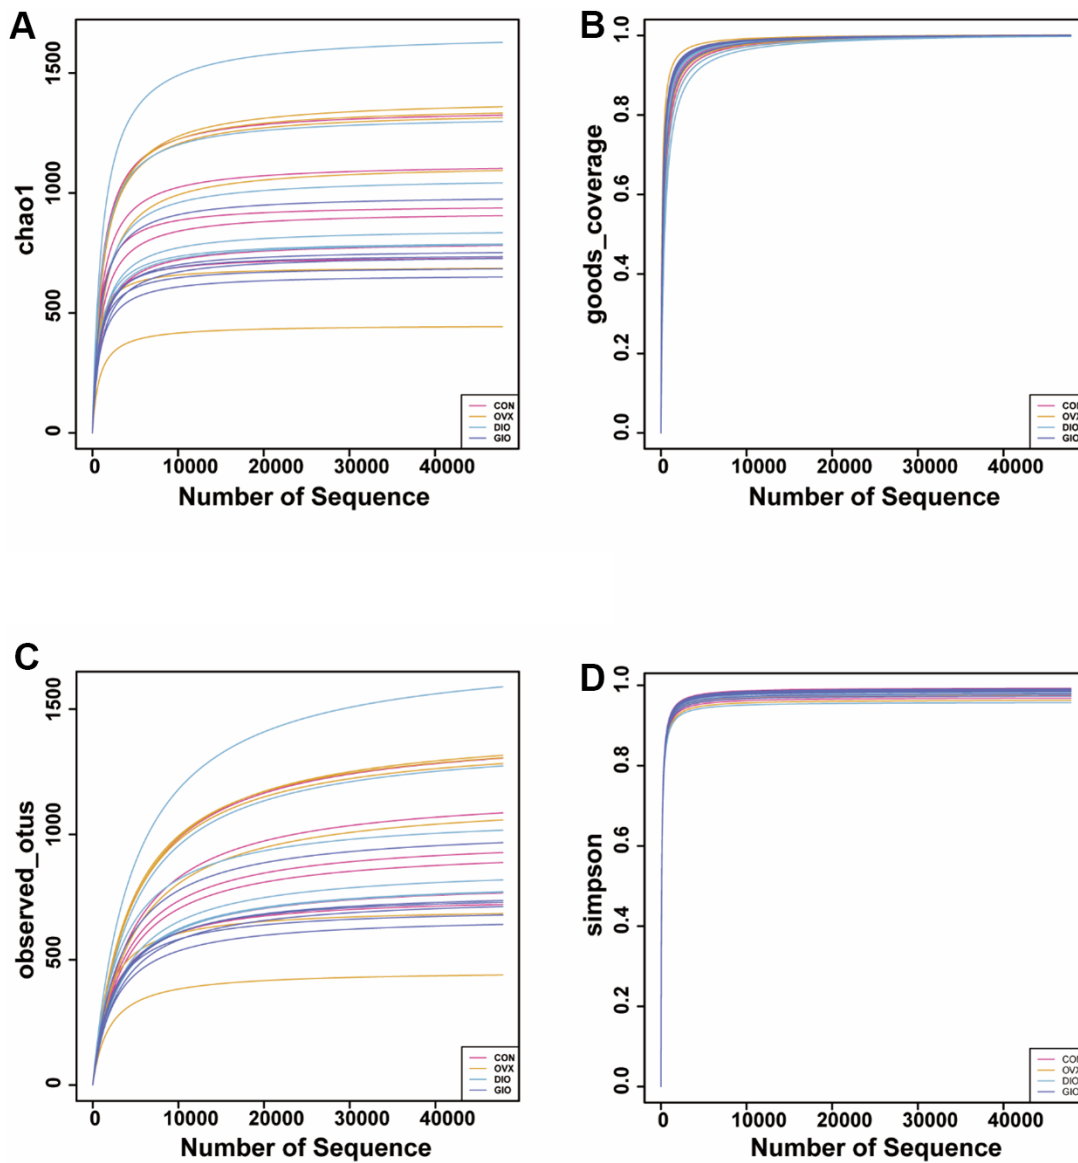

**Supplementary Figure 1. Rarefaction curves of alpha diversity analysis among four groups.** (A) Rarefaction curves in chao1. (B) Rarefaction curves in Goods\_coverage. (C) Rarefaction curves in observed\_species. (D) Rarefaction curves in simpson. n = 6.

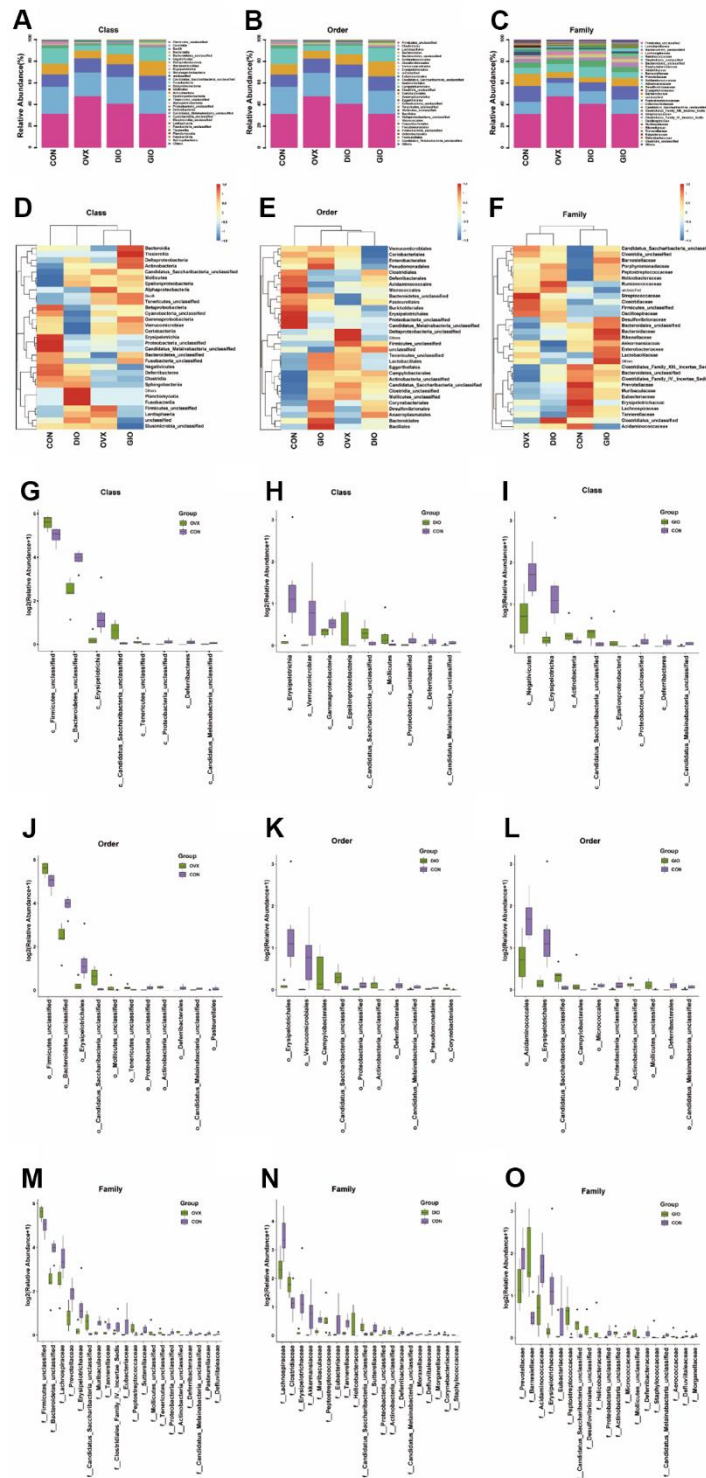

**Supplementary Figure 2. The stacked bar charts, heat maps and significant differences in GM of other levels among the four groups. (A–C) class, order, family-level stacked bar charts. (D–F) class, order, family-level heat maps. (G–I) class-level significant different GM. (J–L) order-level significant different GM. (M–O) family-level significant different GM. n = 6.**

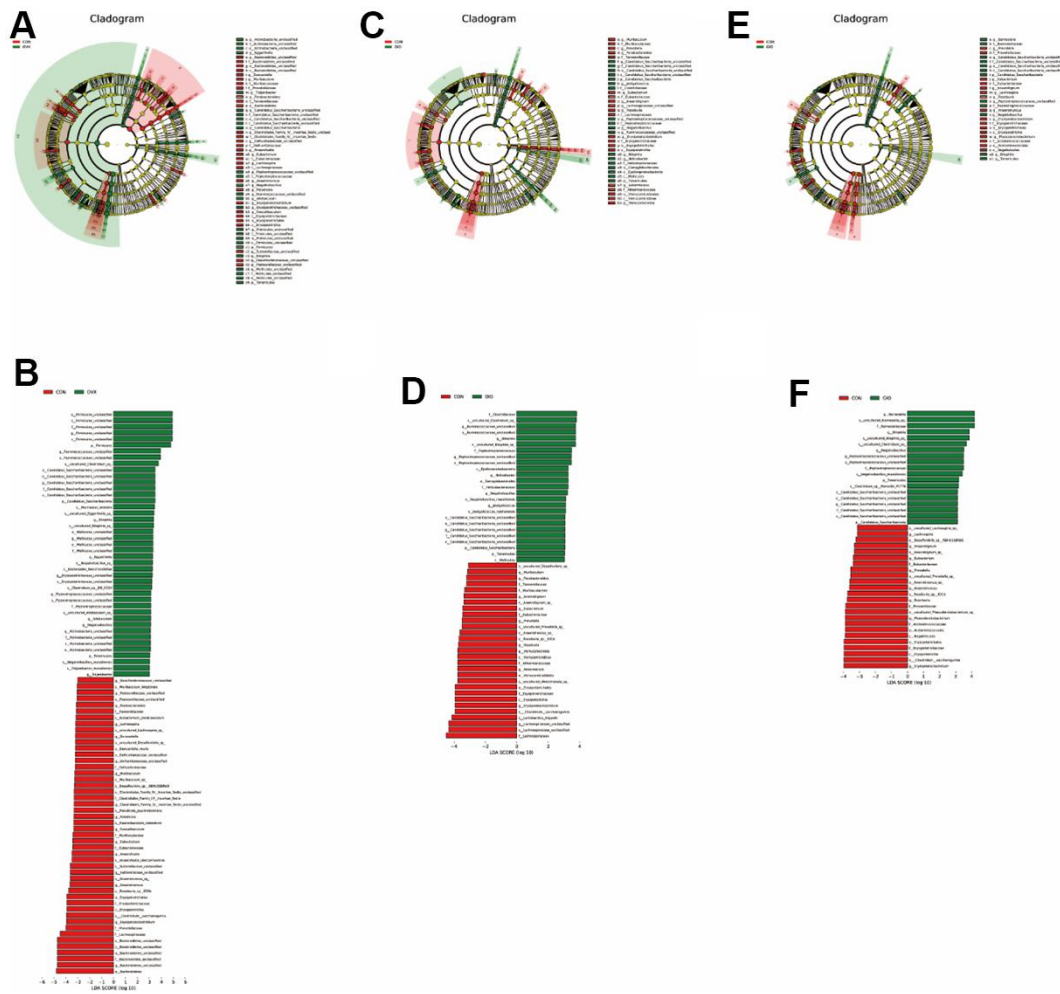

**Supplementary Figure 3. LefSe analysis of gut microbiota in the CON, OVX, DIO and GIO groups. (A, B) CON vs OVX. (C, D) CON vs DIO. (E, F) CON vs GIO. Red represents increased microbiota; green represents decreased microbiota. LDA score > 4.0, n = 6.**
